# Supplementary material for: Immunological Outcomes of Bovine Colostrum Supplementation in Trained and Physically Active People: A Systematic Review and Meta-Analysis
Source: PubMed Central journal article supplement (PMC7231218; doi:10.3390/nu12041023), 2020-04-08
Supplement: nutrients-12-01023-s001.pdf [file nutrients-12-01023-s001.pdf]

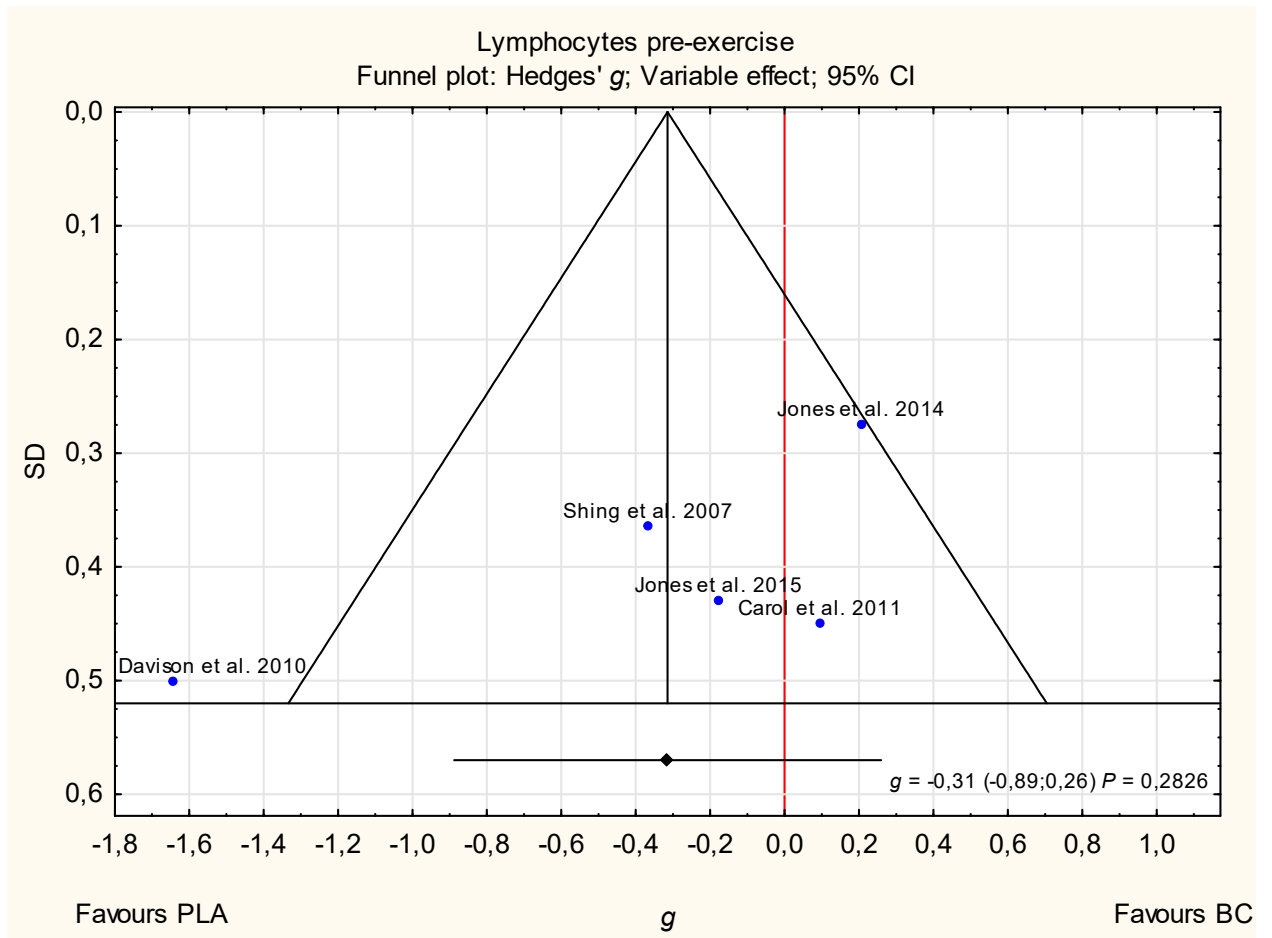

**Figure S1.** Funnel plot of the random-effects meta-analysis of changes in lymphocytes concentration.  
Abbreviations: BC – bovine colostrum, PLA – placebo.

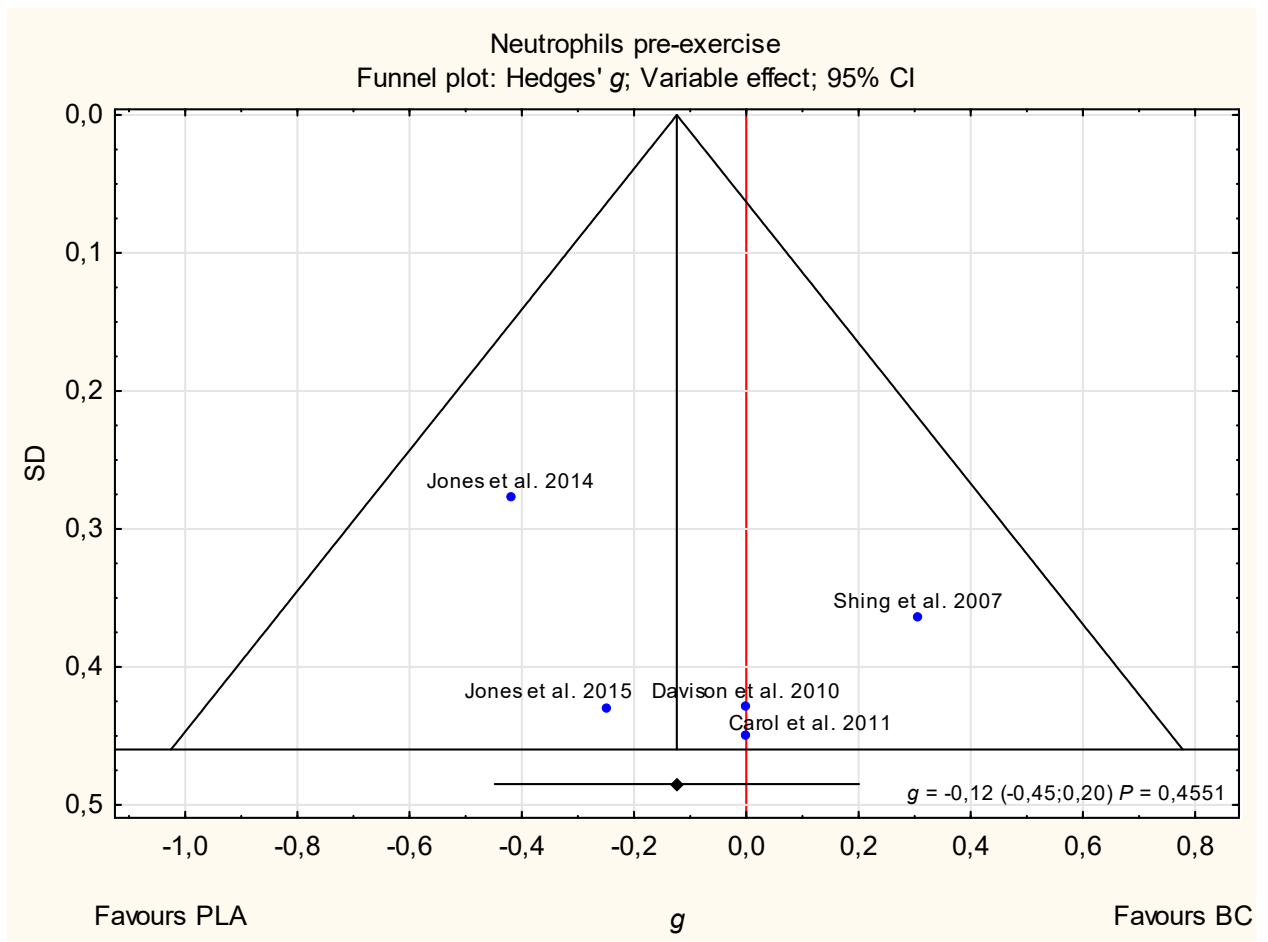

**Figure S2.** Funnel plot of the random-effects meta-analysis of changes in neutrophils concentration.  
Abbreviations: BC – bovine colostrum, PLA – placebo.

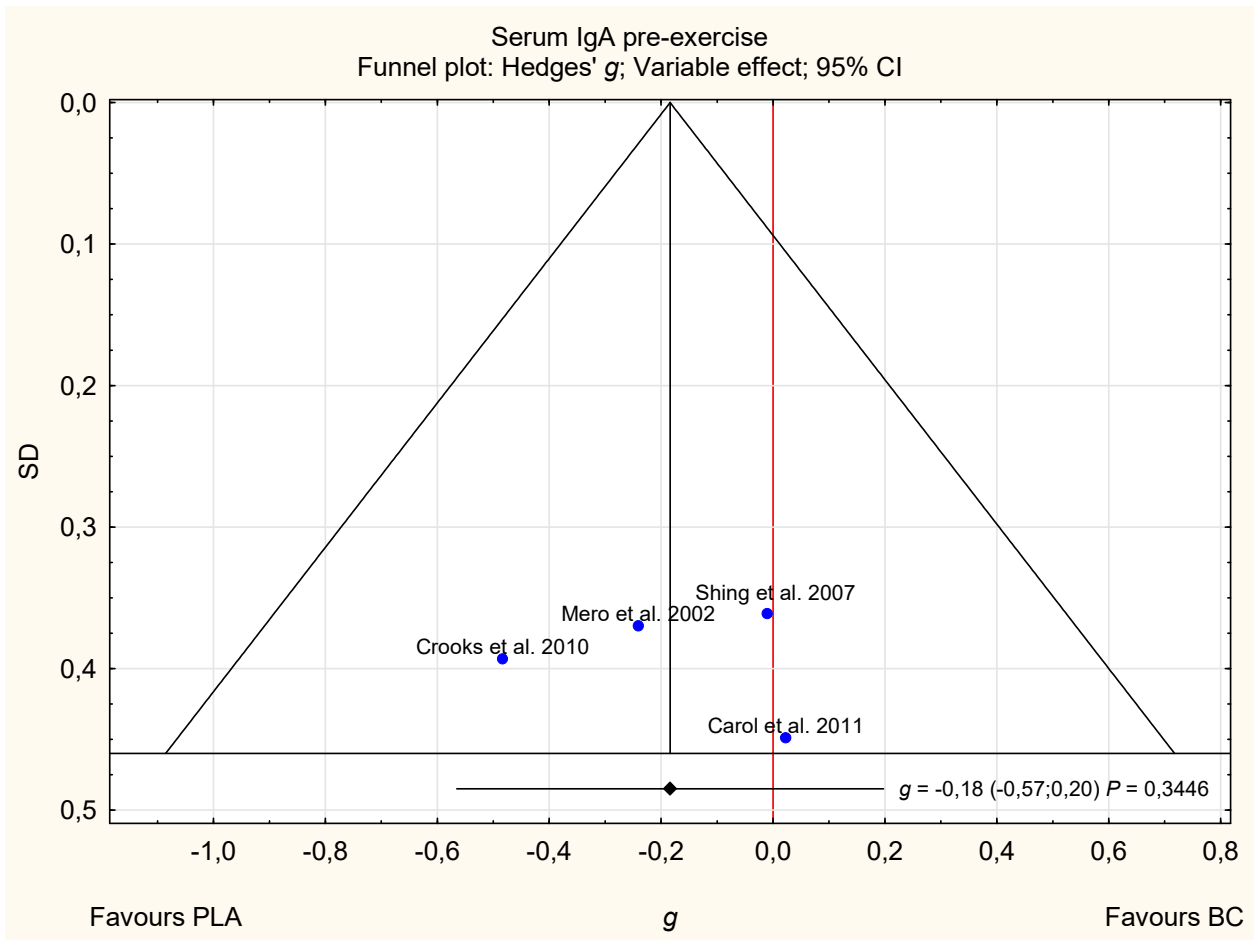

**Figure S3.** Funnel plot of the random-effects meta-analysis of changes in IgA concentration.  
Abbreviations: BC – bovine colostrum, IgA – Immunoglobulin A, PLA – placebo.

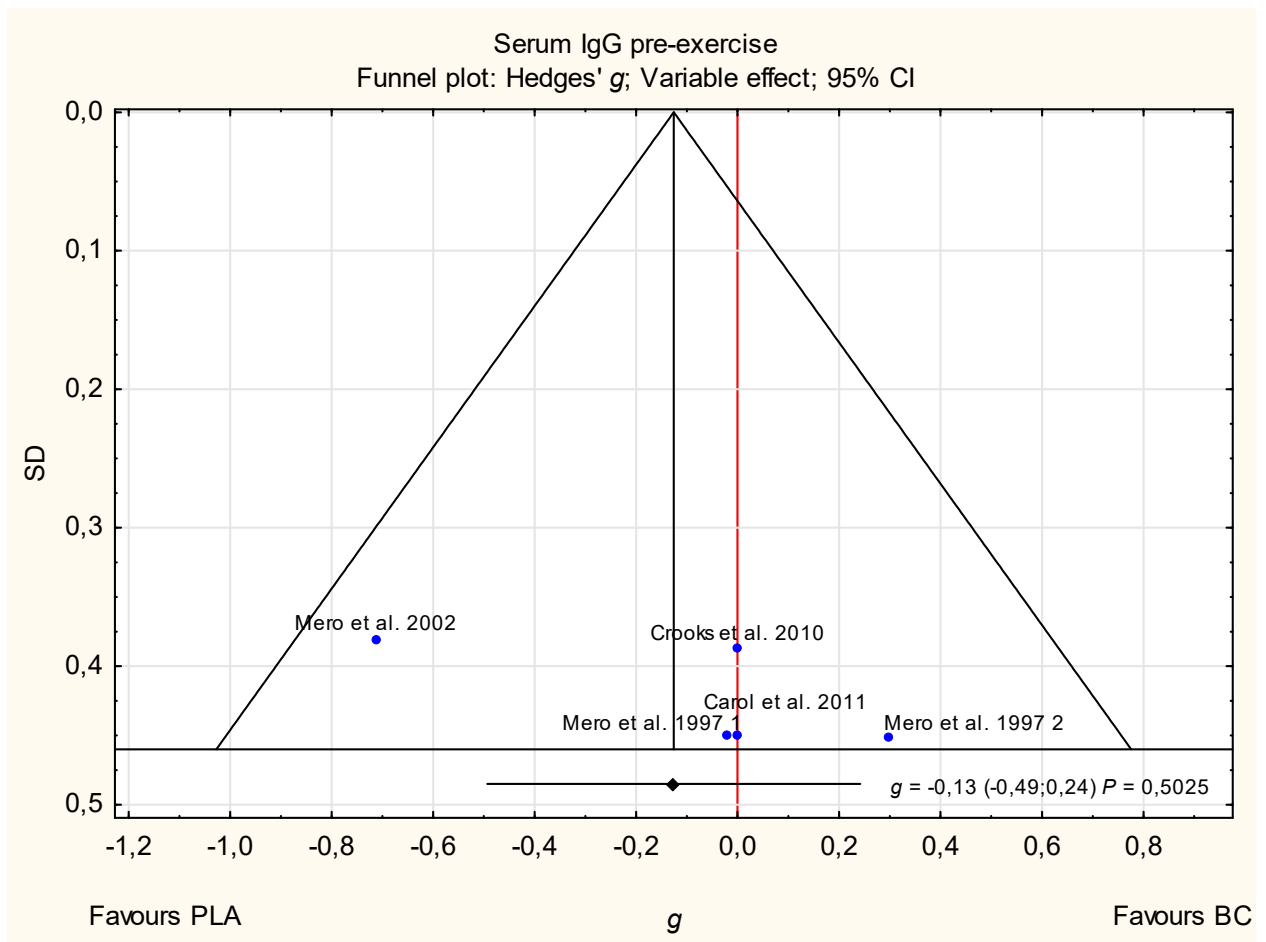

**Figure S4.** Funnel plot of the random-effects meta-analysis of changes in IgG concentration. 1 – the first dose from Mero et al. 1997 study, 2 – the second dose from Mero et al. 1997 study. Abbreviations: BC – bovine colostrum, IgG – Immunoglobulin G, PLA – placebo.

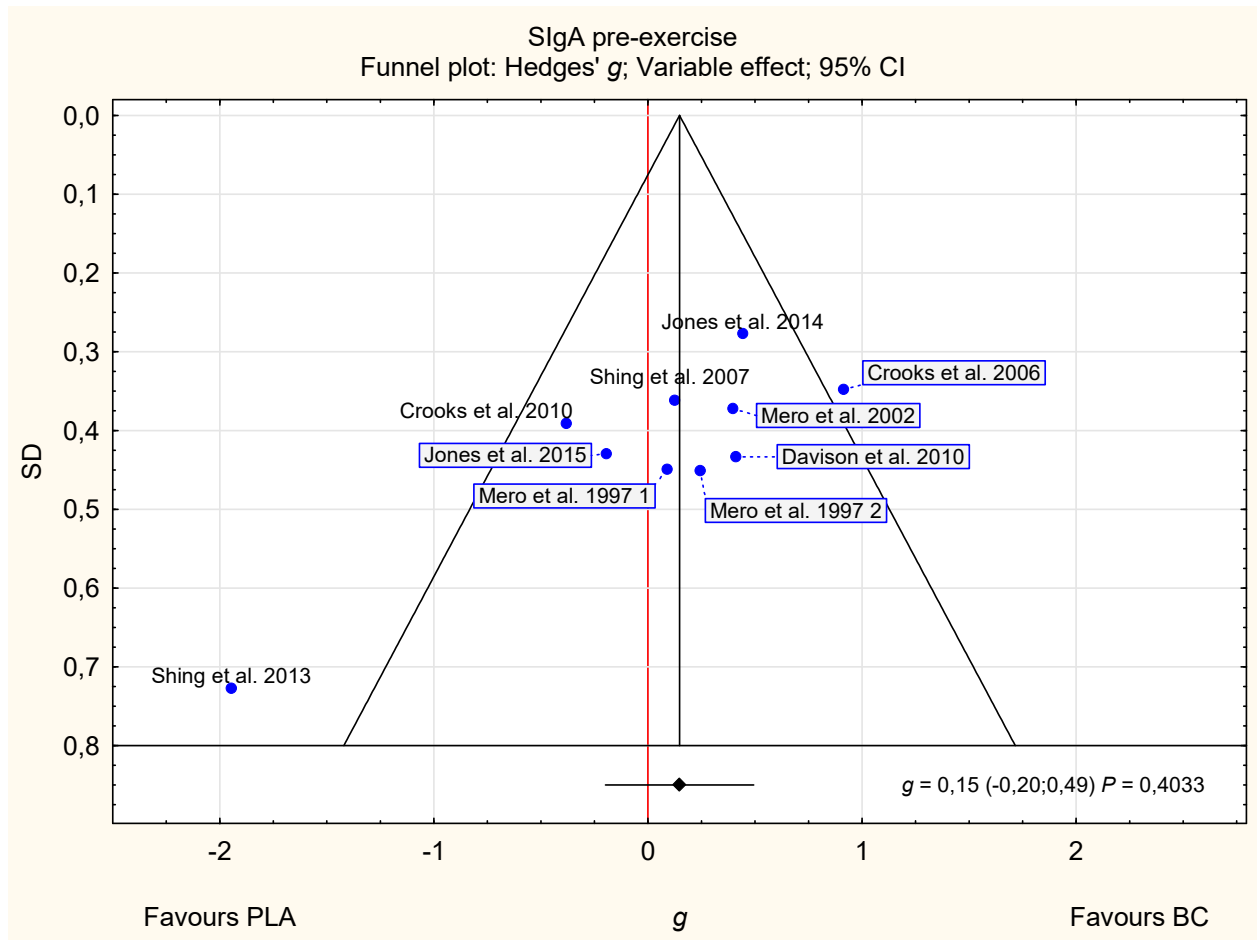

**Figure S5.** Funnel plot of the random-effects meta-analysis of changes in pre-exercise SIgA concentration. 1 – the first dose from Mero et al. 1997 study, 2 – the second dose from Mero et al. 1997 study. Abbreviations: BC – bovine colostrum, SIgA – secretory Immunoglobulin A, PLA – placebo.

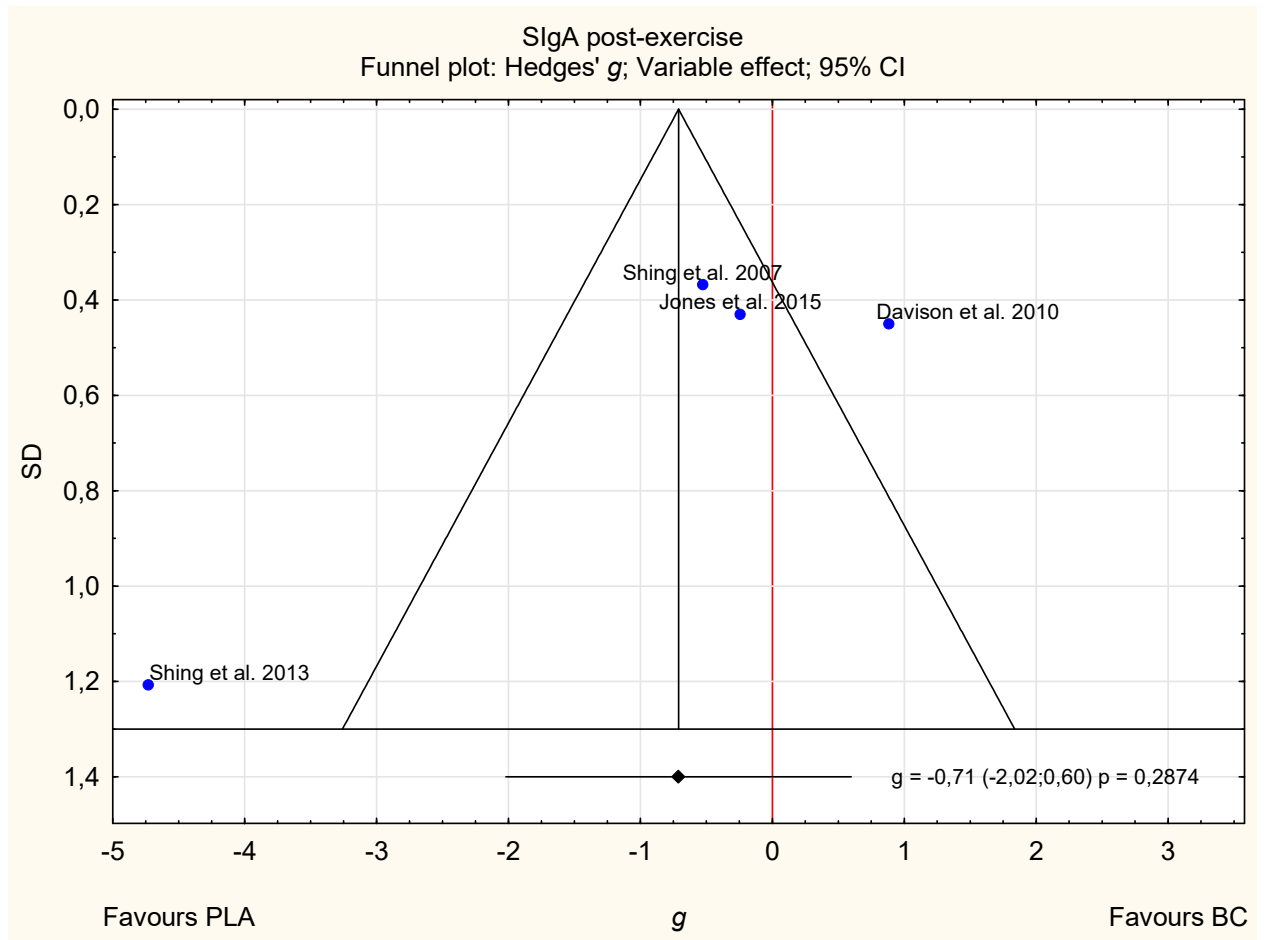

**Figure S6.** Funnel plot of the random-effects meta-analysis of changes in post-exercise SlgA concentration.  
Abbreviations: BC – bovine colostrum, SlgA – secretory Immunoglobulin A, PLA – placebo.

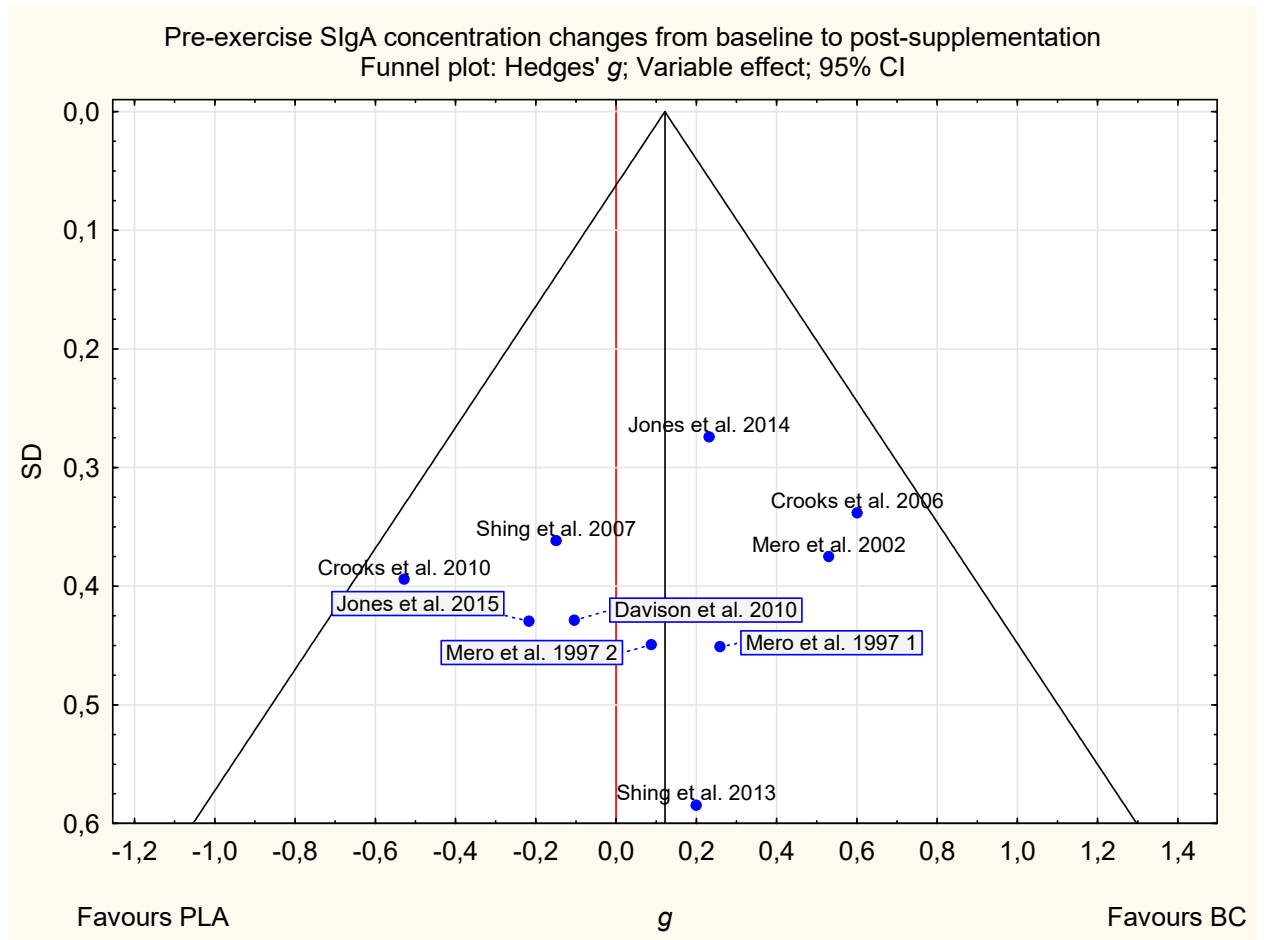

**Figure S7.** Funnel plot of the random-effects meta-analysis of changes from baseline to post-supplementation in pre-exercise SIgA concentration.

1 – the first dose from Mero et al. 1997 study, 2 – the second dose from Mero et al. 1997 study. Abbreviations: BC – bovine colostrum, SIgA – secretory Immunoglobulin A, PLA – placebo.

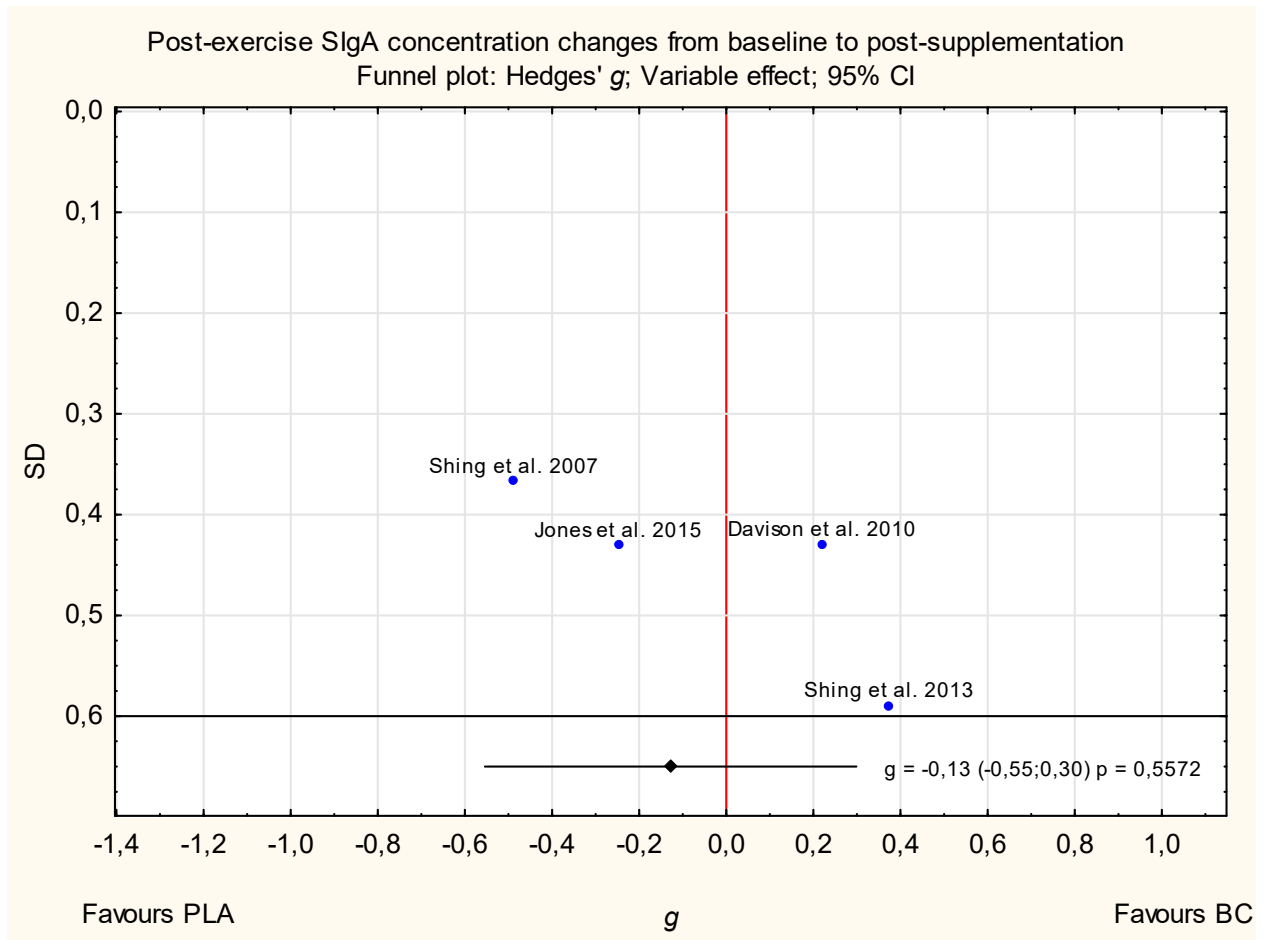

**Figure S8.** Funnel plot of the random-effects meta-analysis of changes from baseline to post-supplementation in post-exercise SIgA concentration.  
 Abbreviations: BC – bovine colostrum, SIgA – secretory Immunoglobulin A, PLA – placebo.
